# Supplementary material for: Antibacterial Properties of Three-Dimensional Flower Cluster ZIF-L Modified by N-Doped Carbon Dots
Source: MDPI journal article supplement (doi:10.3390/cryst13040564), 2023-03-25
Supplement: s1 [file s1]

Archive with 1 entries (1 files):
- crystals-2290934-supplementary.pdf
